# Supplementary material
Source: publisher site journal article supplement (https://en-cdn.bio-protocol.org/attached/file/20200615/3673%20Suppl%201%20PCCcalc%20code.docx)
Supplement: Supplementary file 1 [file 3673%20Suppl%201%20PCCcalc%20code.docx]

function pearsonCorr = PCCcalc

% Add peasonCorr to the MATLAB path. The function will open a dialog box to

% select the directory containing .tif images.

% PCCcalc expects to find individual .tif images rather than multi-image

% tif files. PCCcalc requires an equal number of images in each of 3

% channels. For example, if there are 10 fields of view, then PCCcalc

% expects 30 images. The three images of an individual field of view must

% have a unique identifying string. Likewise, each channel must have its

% own unique identifying string. For example, two images stacks exported as

% individual .tif files from most Leica software will have the following

% naming convention:

% <Unique ID 1>_ch00.tif

% <Unique ID 1>_ch01.tif

% <Unique ID 1>_ch02.tif

% <Unique ID 2>_ch00.tif

% <Unique ID 2>_ch01.tif

% <Unique ID 2>_ch02.tif

% PCCcalc begins by asking what is the string corresponding to the

% "tester" channel representing the LacI fusion protein. In Terra's data,

% this was always ch01. PCCcalc then asks for the string corresponding to

% the "target" channel representing potentially relocalized components of

% chromatin-modifying complexes or other factors. In Terra's data, this was

% always ch02. PCCcalc then asks for the string representing the Hoechst

% staining, which in Terra's data was always ch03.

% After obtaining the three channel strings, the function verifies that the

% same number of images are found in each channel and will terminate if

% not.

% PCCcalc looks for prior analysis in subdirectory autoCrop in the working

% directory. If autoCrop is not present, this directory is created. If

% autoCrop is present, PCCcalc will attempt to determine if analysis of the

% data in the working directory is either partially or fully completed. If

% partially completed, the function resumes at the next unanalyzed field of

% view. If fully completed, PCCcalc presents the option to rename the

% analysis directory or to overwrite the prior analysis results.

% The analysis routine generates cropped images in each of the 3 channels,

% constructs masks with user input, and saves the cropped images and masks

% to directory autoCrop. The analysis also saves the output pearsonCorr.

% PeasonCorr is a 3xN matrix. For each of N images, it creates masks from

% the combination of Hoechst and ch01 channels, then calculates the

% correlation coefficient between each pair of channels.

% row 1: red-green correlation

% row 2: green-blue correlation

% row 3: blue-red correlation

% The analysis routine also saves the analysis figure window corresponding

% to each field of view.

origDir = pwd;

selpath = uigetdir;

cd(selpath)

warning('off','images:imshow:magnificationMustBeFitForDockedFigure')

% 1. Find images.

greenC = input('String for tester channel: ','s');

greenC2 = ['*',greenC,'*','.tif'];

gFiles = dir(greenC2);

gFiles = gFiles(arrayfun(@(x) ~strcmp(x.name(1),'.'),gFiles));

lg = length(gFiles);

fprintf('Found %d files.\n',lg)

redC = input('String for target channel: ','s');

redC2 = ['*',redC,'*','.tif'];

rFiles = dir(redC2);

rFiles = rFiles(arrayfun(@(x) ~strcmp(x.name(1),'.'),rFiles));

lr = length(rFiles);

fprintf('Found %d files.\n',lr)

DC = input('String for Hoechst channel: ','s');

DC2 = ['*',DC,'*','.tif'];

dFiles = dir(DC2);

dFiles = dFiles(arrayfun(@(x) ~strcmp(x.name(1),'.'),dFiles));

ld = length(dFiles);

fprintf('Found %d files.\n',ld)

dIm = 2;

if ~(lr == lg)

disp('Nonequivalent numbers of green and red images. Stopping...')

return

elseif ~isempty(dIm) && ~(lr == ld)

disp('Nonequivalent numbers of DAPI and red images. Stopping...')

return

end

% 2. Check if some analysis has been performed previously.

ssG = zeros(105,105,lg,'uint8');

ssR = ssG;

ssD = ssG;

croppedDirName = fullfile(pwd,'autoCrop');

PCname = fullfile(croppedDirName,'pearsonCCs.mat');

masksName = fullfile(croppedDirName,'masks.mat');

if ~exist(croppedDirName,'dir')

% No prior analysis found.

mkdir(croppedDirName)

startingN = 1;

pearsonCorr = zeros(3,lg-startingN+1);

masks = false(size(ssG));

else

% Found folder for analysis. How many cropped images were saved?

priorAn = dir(fullfile(croppedDirName,'maskG*.tif'));

if isempty(priorAn)

% No prior analysis found.

startingN = 1;

pearsonCorr = zeros(3,lg-startingN+1);

masks = false(size(ssG));

else

lpa = length(priorAn);

lastAn = priorAn(lpa).name(7:end);

if strcmp(lastAn,gFiles(lpa).name)

% Successfully matched analysis and raw data

if lpa < length(gFiles)

% Incomplete mask creation

disp(['Found prior masks up to image ',gFiles(lpa).name(1:end-9),'.'])

disp(['Continuing analysis starting with ',gFiles(lpa+1).name(1:end-9),'.'])

startingN = lpa+1;

load(PCname)

load(masksName)

else

% Either previously completed mask creation, or cannot

% match prior analysis with raw data. Ask if should move to

% new folder or overwrite results entirely.

disp('Prior analysis folder already exists.')

if lpa == length(gFiles)

disp('Prior mask creation completed.')

ra = input('Do you want to load previously calculated correlations (y/n)? ','s');

if ra == 'y'

pearsonCorr = load(PCname,'pearsonCorr');

cd(origDir)

return

else

raa = input('Do you want to redo analysis (y/n)? ','s');

if raa == 'y'

disp('Starting mask creation from beginning.')

startingN = 1;

pearsonCorr = zeros(3,lg-startingN+1);

masks = false(size(ssG));

sk = input('Rename prior directory (y/n)? ','s');

if sk == 'y'

hj = input('New name for prior analysis: ','s');

newDirName = fullfile(pwd,hj);

movefile(croppedDirName,newDirName)

else

disp('Prior results will be overwritten.')

rmdir(croppedDirName,'s')

end

else

disp('Stopping PCCcalc.')

pearsonCorr = [];

cd(origDir)

return

end

end

else

disp('Unsuccessful at determining extent of previous analysis.')

startingN = 1;

pearsonCorr = zeros(3,lg-startingN+1);

masks = false(size(ssG));

sk = input('Rename prior directory (y/n)? ','s');

if sk == 'y'

hj = input('New name for prior analysis: ','s');

newDirName = fullfile(pwd,hj);

movefile(croppedDirName,newDirName)

else

disp('Prior results will be overwritten.')

rmdir(croppedDirName,'s')

end

end

end

end

end

end

% 3. Select "plaquette" containing the enriched tester fluorescence.

if ~(lg == startingN)

for mj = startingN:lg

fprintf('Beginning analysis image %d...\n',mj)

% Read images.

gIm = imread(gFiles(mj).name);

rIm = imread(rFiles(mj).name);

dIm = imread(dFiles(mj).name);

% Click on or near the center of the enriched fluorescence.

RGBt = clickPoint(gIm,rIm,dIm);

% Calculate temporary mask and display in subplot 2

fh2 = figure('visible','on','windowstyle','normal');

set(fh2, 'Position', [100 100 800 800]);

ah{1} = subplot(2,2,1); % Display Hoechst + Hoechst mask

ah{2} = subplot(2,2,2); % Display GFP + GFP mask

ah{3} = subplot(2,2,3); % Display overlay of masks with GFP in G, Hoechst in magenta

ah{4} = subplot(2,2,4); % Display GFP-Hoechst co-images with the joint mask in cyan

FileNameT = dFiles(mj).name;

FileName = strrep(FileNameT,'_',' ');

% Generate the mask.

[RGBt,gMask,dMask,ah] = generateMask(RGBt,fh2,ah,FileName,gIm,rIm,dIm);

ssG(:,:,mj) = RGBt(:,:,2);

ssR(:,:,mj) = RGBt(:,:,1);

ssD(:,:,mj) = RGBt(:,:,3);

% Save cropped images.

cropImNameG = fullfile(croppedDirName,['crop_',gFiles(mj).name]);

imtowrite = ssG(:,:,mj);

imwrite(imtowrite,cropImNameG)

cropImNameR = fullfile(croppedDirName,['crop_',rFiles(mj).name]);

imtowrite = ssR(:,:,mj);

imwrite(imtowrite,cropImNameR)

cropImNameD = fullfile(croppedDirName,['crop_',dFiles(mj).name]);

imtowrite = ssD(:,:,mj);

imwrite(imtowrite,cropImNameD)

% here save masks as tif files:

maskName = fullfile(croppedDirName,['maskG_',gFiles(mj).name]);

imtowrite = im2uint8(gMask);

imwrite(imtowrite,maskName)

maskName = fullfile(croppedDirName,['maskD_',dFiles(mj).name]);

imtowrite = im2uint8(dMask);

imwrite(imtowrite,maskName)

combinedMask = gMask & dMask;

maskName = fullfile(croppedDirName,['maskBoth_',dFiles(mj).name]);

imtowrite = im2uint8(combinedMask);

imwrite(imtowrite,maskName)

masks(:,:,mj) = combinedMask;

% Calculate correlation coeff for all 3 channels:

if sum(sum(combinedMask)) > 0

GFf = ssG(:,:,mj);

RFf = ssR(:,:,mj);

DFf = ssD(:,:,mj);

statsG = regionprops(combinedMask,GFf,'PixelValues');

statsR = regionprops(combinedMask,RFf,'PixelValues');

statsD = regionprops(combinedMask,DFf,'PixelValues');

sizes = arrayfun(@(x) length(x.PixelValues),statsG);

iiidx = find(sizes == max(sizes));

data = double([statsR(iiidx).PixelValues statsG(iiidx).PixelValues]);

RHO = corr(data);

pearsonCorr(1,mj) = RHO(1,2);

data = double([statsG(iiidx).PixelValues statsD(iiidx).PixelValues]);

RHO = corr(data);

pearsonCorr(2,mj) = RHO(1,2);

data = double([statsD(iiidx).PixelValues statsR(iiidx).PixelValues]);

RHO = corr(data);

pearsonCorr(3,mj) = RHO(1,2);

% Create .fig file for future reference.

F = figure('visible','on','windowstyle','docked');

subplot(2,3,1)

image(RGBt); axis equal tight

subplot(2,3,2)

imagesc(combinedMask); axis equal tight

title(FileName)

% subplot(2,3,3)

subplot(2,3,4)

plot(statsG(iiidx).PixelValues,statsR(iiidx).PixelValues,'o','markerfacecolor',[0 0.7 0.7],'markersize',3); axis square tight

xlabel('green intensity (A.U.)')

ylabel('red intensity (A.U.)')

TM = sprintf('RG-Corr. Coeff %0.4f',pearsonCorr(1,mj));

title(TM)

subplot(2,3,5)

plot(statsG(iiidx).PixelValues,statsD(iiidx).PixelValues,'o','markerfacecolor',[0 0.7 0.7],'markersize',3); axis square tight

xlabel('green intensity (A.U.)')

ylabel('blue intensity (A.U.)')

TM = sprintf('GB-Corr. Coeff %0.4f',pearsonCorr(2,mj));

title(TM)

subplot(2,3,6)

plot(statsD(iiidx).PixelValues,statsR(iiidx).PixelValues,'o','markerfacecolor',[0 0.7 0.7],'markersize',3); axis square tight

xlabel('blue intensity (A.U.)')

ylabel('red intensity (A.U.)')

TM = sprintf('RB-Corr. Coeff %0.4f',pearsonCorr(3,mj));

title(TM)

figname = fullfile(croppedDirName,['TKa_',gFiles(mj).name(1:end-9),'.fig']);

savefig(F,figname)

else

pearsonCorr(:,mj) = [nan; nan; nan];

disp('Skipping this image.')

end

save(PCname,'pearsonCorr')

save(masksName,'masks')

disp('Press any key to continue...')

pause

close

cd(origDir)

end

end

end

function [RGBt,gMask,dMask,ah] = generateMask(RGBt,fh2,ah,FileName,gIm,rIm,dIm)

% Idea is to take the RGB input and output a pair of masks using G and B

% channels, modifying the masks as needed using keyboard commands.

% 1. Make an initial guess about the DAPI mask.

[dBWstack, dapiGuessIdx] = initialDapiGuess(RGBt);

bestInitialDapiGuess = dapiGuessIdx;

% 2. Make an initial guess about the GFP-based mask.

[gBWstack,titoO] = initialGFPguess(RGBt);

bestInitialGFPGuess = titoO;

% 3. Display initial guess masks on top of BW images in each channel.

currentDapiMask = dBWstack(:,:,dapiGuessIdx);

currentGFPMask = gBWstack(:,:,titoO);

[fh2,ah] = dispMasks(RGBt, currentDapiMask, currentGFPMask, fh2, ah, FileName);

% 4. Permit user to change this range in +/-2 A.U. increments to alter

% the threshold.

% polyByHand = false(size(currentDapiMask));

erosionStruct = ones(3);

cont = true;

while cont == true

waitforbuttonpress;

key = get(gcf,'CurrentCharacter');

switch key

case 'a'

% make current Hoechst mask smaller by erosion

currentDapiMask = imerode(currentDapiMask,erosionStruct);

[fh2,ah] = dispMasks(RGBt, currentDapiMask, currentGFPMask, fh2, ah, FileName);

case 's'

% make current Hoechst mask larger by dilation

currentDapiMask = imdilate(currentDapiMask,erosionStruct);

[fh2,ah] = dispMasks(RGBt, currentDapiMask, currentGFPMask, fh2, ah, FileName);

case 'd'

% make Hoechst mask smaller by using a higher threshold

dapiGuessIdxT = dapiGuessIdx + 1;

if dapiGuessIdxT < 122

dapiGuessIdx = dapiGuessIdx + 1;

currentDapiMask = dBWstack(:,:,dapiGuessIdx);

[fh2,ah] = dispMasks(RGBt, currentDapiMask, currentGFPMask, fh2, ah, FileName);

end

case 'f'

% make Hoechst mask larger by using a lower threshold

dapiGuessIdxT = dapiGuessIdx - 1;

if dapiGuessIdxT > 1

dapiGuessIdx = dapiGuessIdx - 1;

currentDapiMask = dBWstack(:,:,dapiGuessIdx);

[fh2,ah] = dispMasks(RGBt, currentDapiMask, currentGFPMask, fh2, ah, FileName);

end

case'g'

% draw polygonal region of interest for Hoechst.

% if sum(sum(polyByHand)) == 0

F = figure('windowstyle','docked');

polyByHand = roipoly(RGBt(:,:,3));

close(F)

% end

[currentDapiMask,polyByHand,fh2,ah] = toggleByHand(polyByHand,RGBt,currentDapiMask,currentGFPMask,fh2,ah,FileName);

[fh2,ah] = dispMasks(RGBt, currentDapiMask, currentGFPMask, fh2, ah, FileName);

case 'z'

% Make current GFP mask smaller by erosion

currentGFPMask = imerode(currentGFPMask,erosionStruct);

[fh2,ah] = dispMasks(RGBt, currentDapiMask, currentGFPMask, fh2, ah, FileName);

case 'x'

% Make current GFP mask larger by dilation

currentGFPMask = imdilate(currentGFPMask,erosionStruct);

[fh2,ah] = dispMasks(RGBt, currentDapiMask, currentGFPMask, fh2, ah, FileName);

case 'c'

% make GFP mask smaller by using a higher threshold

titoOT = titoO + 1;

if titoOT < size(gBWstack,3)

titoO = titoO + 1;

currentGFPMask = gBWstack(:,:,titoO);

[fh2,ah] = dispMasks(RGBt, currentDapiMask, currentGFPMask, fh2, ah, FileName);

end

case 'v'

% make GFP mask larger by using a lower threshold

titoOT = titoO - 1;

if titoOT > 1

titoO = titoO - 1;

currentGFPMask = gBWstack(:,:,titoO);

[fh2,ah] = dispMasks(RGBt, currentDapiMask, currentGFPMask, fh2, ah, FileName);

end

case 'r'

% Accept this set of masks

gMask = currentGFPMask;

dMask = currentDapiMask;

close(fh2)

cont = false;

case 'u'

% restart Hoechst from best initial guess

dapiGuessIdx = bestInitialDapiGuess;

currentDapiMask = dBWstack(:,:,bestInitialDapiGuess);

[fh2,ah] = dispMasks(RGBt, currentDapiMask, currentGFPMask, fh2, ah, FileName);

case 'j'

% restart GFP from best initial guess

titoO = bestInitialGFPGuess;

currentGFPMask = gBWstack(:,:,titoO);

[fh2,ah] = dispMasks(RGBt, currentDapiMask, currentGFPMask, fh2, ah, FileName);

case 'i'

% Ignore this image forever.

gMask = false(size(currentGFPMask));

dMask = gMask;

close(fh2)

cont = false;

case 'k'

% reclick point

RGBt = clickPoint(gIm,rIm,dIm);

[dBWstack, dapiGuessIdx] = initialDapiGuess(RGBt);

bestInitialDapiGuess = dapiGuessIdx;

[gBWstack,titoO] = initialGFPguess(RGBt);

bestInitialGFPGuess = titoO;

currentDapiMask = dBWstack(:,:,bestInitialDapiGuess);

currentGFPMask = gBWstack(:,:,titoO);

[fh2,ah] = dispMasks(RGBt, currentDapiMask, currentGFPMask, fh2, ah, FileName);

end

end

end

function [gBWstack,titoO] = initialGFPguess(RGBt)

GF2 = RGBt(:,:,2);

linGF = reshape(RGBt(:,:,2),1,size(RGBt,1)*size(RGBt,2));

figure('visible','on','windowstyle','docked')

h = histogram(linGF);

A1 = h.Values;

B1 = h.BinEdges(2:end) - h.BinWidth;

close

A2 = smooth(A1',3);

A2max = find(A2 == max(A2));

if length(A2max) > 1, A2max = A2max(2); end

A2n = A2(A2max:end);

% Find place where slope changes the fastest:

A3 = diff(A2n);

A3s = smooth(A3,3);

A4 = diff(A3s);

A4s = smooth(A4,3);

A5 = diff(A4s);

% Place where noise explodes is found at:

A5s = smooth(A5,3);

maxChangeIdx = find(A5s==min(A5s));

if length(maxChangeIdx) > 1

maxChangeIdx = mean(maxChangeIdx);

end

% Try different noiseBound values.

GFf = RGBt(:,:,2);

RFf = RGBt(:,:,1);

binONs = maxChangeIdx+A2max:maxChangeIdx+A2max+19;

if sum(binONs > length(B1)) > 0

binONs = binONs(1):length(B1);

end

lenbo = length(binONs);

noiseBounds = B1(binONs);

gBWstack = false([size(GF2),lenbo]);

numPix = zeros(1,lenbo);

pearsonCorrGT = zeros(1,lenbo);

for i=1:lenbo

gT = GF2;

gT(gT<noiseBounds(i)) = 0;

gT2 = logical(gT);

CC = bwconncomp(gT2);

numPixels = cellfun(@numel,CC.PixelIdxList);

[~,idx] = max(numPixels);

numPix(i) = numPixels(idx);

tS = false(size(GF2));

tS(CC.PixelIdxList{idx}) = true;

gBWstack(:,:,i) = tS;

statsG = regionprops(tS,GFf,'PixelValues');

statsR = regionprops(tS,RFf,'PixelValues');

data = double([statsG.PixelValues statsR.PixelValues]);

RHO = corr(data);

pearsonCorrGT(i) = RHO(1,2);

end

% Additional filtering: if the mask encompasses larger than 10% of the

% cropped image area, it is too large.

pctm = mean(pearsonCorrGT);

if pctm < 0

pearsonCorrGT(pearsonCorrGT > 0) = 0;

pearsonCorrGT = abs(pearsonCorrGT);

sizLim = 0.1*105*105;

szPCTidx = numPix <= sizLim & pearsonCorrGT > 0;

titoI = numPix == min(numPix(szPCTidx));

titoO = find(titoI);

else

pearsonCorrGT(pearsonCorrGT < 0) = 0;

didx = pearsonCorrGT == max(pearsonCorrGT);

titoI = find(didx);

titoO = titoI(1);

end

titoO = titoO(1);

end

function [dBWstack, dapiGuessIdx] = initialDapiGuess(RGBt)

fh = figure('visible','on');

set(fh, 'Position', [100 100 800 800]);

imshow(RGBt(:,:,3),'initialMagnification','fit');

title('(t)oggle or (s)elect')

% Toggle between DAPI view and GFP view to find approximate region to

% select.

cont = true; displayIm = 1;

while cont == true

waitforbuttonpress;

key = get(gcf,'CurrentCharacter');

if key == 's'

imshow(RGBt(:,:,3),'initialMagnification','fit')

title('Click pixel to create mask:')

[x,y] = ginput(1);

close(fh)

cont = false;

elseif key == 't'

displayIm = displayIm+1;

if mod(displayIm,2) == 0

imshow(RGBt(:,:,2),'initialMagnification','fit'); title('(t)oggle or (s)elect')

else

imshow(RGBt(:,:,3),'initialMagnification','fit'); title('(t)oggle or (s)elect')

end

end

end

% Generate a binary image using the mean intensity in the vicinity

x = round(x); y = round(y);

dtx = mean(mean(RGBt(y-1:y+1,x-1:x+1,3)));

% Now generate a stack of 100 images using various tx spanning the range

txRange = 10:2:252;

dBWstack = false(size(RGBt,1),size(RGBt,2),122);

for i=1:length(txRange)

tempD = RGBt(:,:,3); tempD(tempD<txRange(i)) = 0; tempD(tempD>=txRange(i)) = 1;

dBWstack(:,:,i) = logical(tempD);

end

closestTxtoGuess = abs(txRange - dtx);

guessLow = min(closestTxtoGuess);

dapiGuessIdx = find(closestTxtoGuess == guessLow(1));

dapiGuessIdx = dapiGuessIdx(1);

end

function [fh2,ah] = dispMasks(RGBt, dBW, gBW, fh2, ah, FileName)

% Calculate mask outlines from inital guess masks, then display.

% DAPI mask:

dBWp1 = imerode(dBW,ones(3));

dBWsub = dBW - dBWp1;

dBWsub = logical(dBWsub);

currentDapiMask = zeros(105,105,3,'uint8');

tempTim = round(255*(double(RGBt(:,:,3) - min(min(RGBt(:,:,3))))/max(max(double(RGBt(:,:,3) - min(min(RGBt(:,:,3))))))));

tempTim(dBWsub) = 255;

currentDapiMask(:,:,1) = tempTim;

tempTim(dBWsub) = 0;

currentDapiMask(:,:,2) = tempTim;

currentDapiMask(:,:,3) = tempTim;

axes(ah{1})

image(currentDapiMask); axis off equal tight; box off

title(FileName)

% GFP mask:

gBWp1 = imerode(gBW,ones(3));

gBWsub = gBW - gBWp1;

gBWsub = logical(gBWsub);

currentGFPmask = zeros(105,105,3,'uint8');

tempTim = round(255*(double(RGBt(:,:,2) - min(min(RGBt(:,:,2))))/max(max(double(RGBt(:,:,2) - min(min(RGBt(:,:,2))))))));

tempTim(gBWsub) = 255;

currentGFPmask(:,:,2) = tempTim;

tempTim(gBWsub) = 0;

currentGFPmask(:,:,1) = tempTim;

currentGFPmask(:,:,3) = tempTim;

axes(ah{2})

image(currentGFPmask); axis off equal tight; box off

% Mask overlap: GFP mask in green and DAPI mask in magenta

dispMask1 = zeros(105,105,3,'uint8');

dispMask1(:,:,1) = 255*dBW;

dispMask1(:,:,2) = 255*gBW;

dispMask1(:,:,3) = 255*dBW;

axes(ah{3})

image(dispMask1); axis off equal tight; box off

% Show RGB image of GFP channel and DAPI channel in magenta with the

% outline of the joint mask in cyan:

jointMap = dBW & gBW;

jointMapPl = imerode(jointMap,ones(3));

jointMapsub = logical(jointMap - jointMapPl);

dispMask1 = zeros(105,105,3,'uint8');

% Red channel: DAPI minus mask outline

tempTim = round(255*(double(RGBt(:,:,3) - min(min(RGBt(:,:,3))))/max(max(double(RGBt(:,:,3) - min(min(RGBt(:,:,3))))))));

tempTim(jointMapsub) = 0;

dispMask1(:,:,1) = tempTim;

% Green channel: GFP and mask outline

tempTim = round(255*(double(RGBt(:,:,2) - min(min(RGBt(:,:,2))))/max(max(double(RGBt(:,:,2) - min(min(RGBt(:,:,2)))))))) + jointMap;

tempTim(jointMapsub) = 255;

dispMask1(:,:,2) = tempTim;

% Blue channel: DAPI and mask outline

tempTim = dispMask1(:,:,1);

tempTim(jointMapsub) = 255;

dispMask1(:,:,3) = tempTim;

axes(ah{4})

image(dispMask1); axis off equal tight; box off

end

function RGBt = clickPoint(gIm,rIm,dIm)

RGB = zeros([size(gIm) 3],'uint8');

RGB(:,:,2) = gIm;

RGB(:,:,3) = dIm;

% imagesc(gIm);

figure('visible','on','windowstyle','docked')

image(RGB)

axis off equal tight; box off

title('Click near center of band:')

[x,y] = ginput(1);

x = round(x); y = round(y);

% hold on; plot(x,y,'mx')

RGBt = zeros(105,105,3,'uint8');

RGBt(:,:,2) = gIm(y-52:y+52,x-52:x+52);

RGBt(:,:,1) = rIm(y-52:y+52,x-52:x+52);

RGBt(:,:,3) = dIm(y-52:y+52,x-52:x+52);

close

end

function [currentDapiMask,polyByHand,fh2,ah] = toggleByHand(polyByHand,RGBt,currentDapiMask,currentGFPMask,fh2,ah,FileName)

% Toggle back and forth between current polyByHand mask and current DAPI

% mask, asking whether to accept, redraw by hand, or just use the current

% mask.

[fh2,ah] = dispMasks(RGBt, polyByHand, currentGFPMask, fh2, ah, FileName);

axes(ah{3})

title('Hand-drawn mask:')

contt = true;

ix = 1;

while contt == true

waitforbuttonpress;

key = get(gcf,'CurrentCharacter');

switch key

case 't'

% toggle between Hoechst masks

if ix == 1

[fh2,ah] = dispMasks(RGBt, currentDapiMask, currentGFPMask, fh2, ah, FileName);

axes(ah{3})

title('Previous mask:')

ix = -ix;

else

[fh2,ah] = dispMasks(RGBt, polyByHand, currentGFPMask, fh2, ah, FileName);

axes(ah{3})

title('Hand-drawn mask:')

ix = -ix;

end

case 'p'

% redraw mask by hand

F = figure('windowstyle','docked');

polyByHand = roipoly(RGBt(:,:,3));

close(F)

[fh2,ah] = dispMasks(RGBt, polyByHand, currentGFPMask, fh2, ah, FileName);

axes(ah{3})

title('Hand-drawn mask:')

case 'g'

% accept hand drawn mask

currentDapiMask = polyByHand;

contt = false;

case 'l'

% Reject current hand drawn mask and use previous mask

contt = false;

end

end

end
